# Supplementary material
Source: PubMed Central journal article supplement (PMC7614104)

**Supplementary Figure 1. Uncropped autoradiographs and gels.** Shown are all gels prior to cropping for display in the figures. Instances where full gels are shown in the figure are not replicated here (Extended Data Fig. 5b, 5c). All IVT reactions were controlled for loading by coomassie staining and visualisation of endogenous lysate proteins. All IPs were controlled for recovery and loading by coomassie staining and visualisation of the antibody. Loading controls for cell lysates are displayed within the figure and were also controlled by visualizing the stained gel or blot. The molecular weight markers show throughout this document are in kDa.

**Fig. 1b**

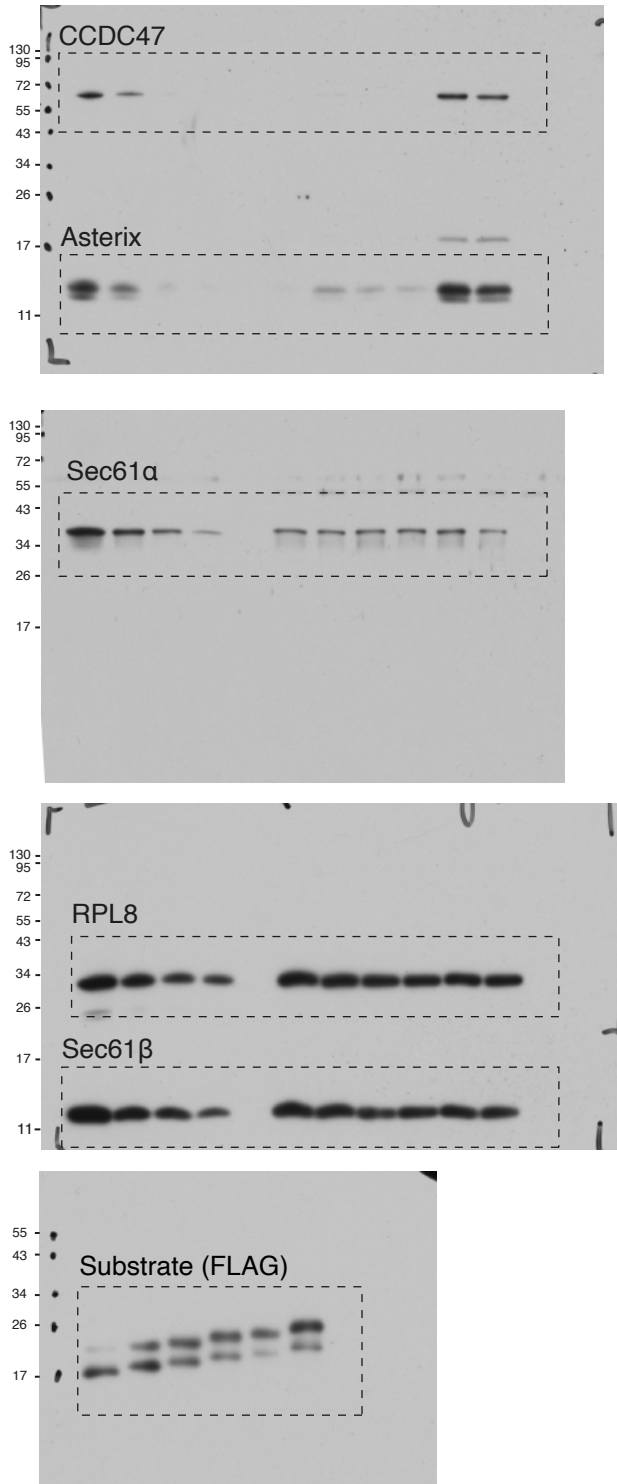

**Fig. 1c**

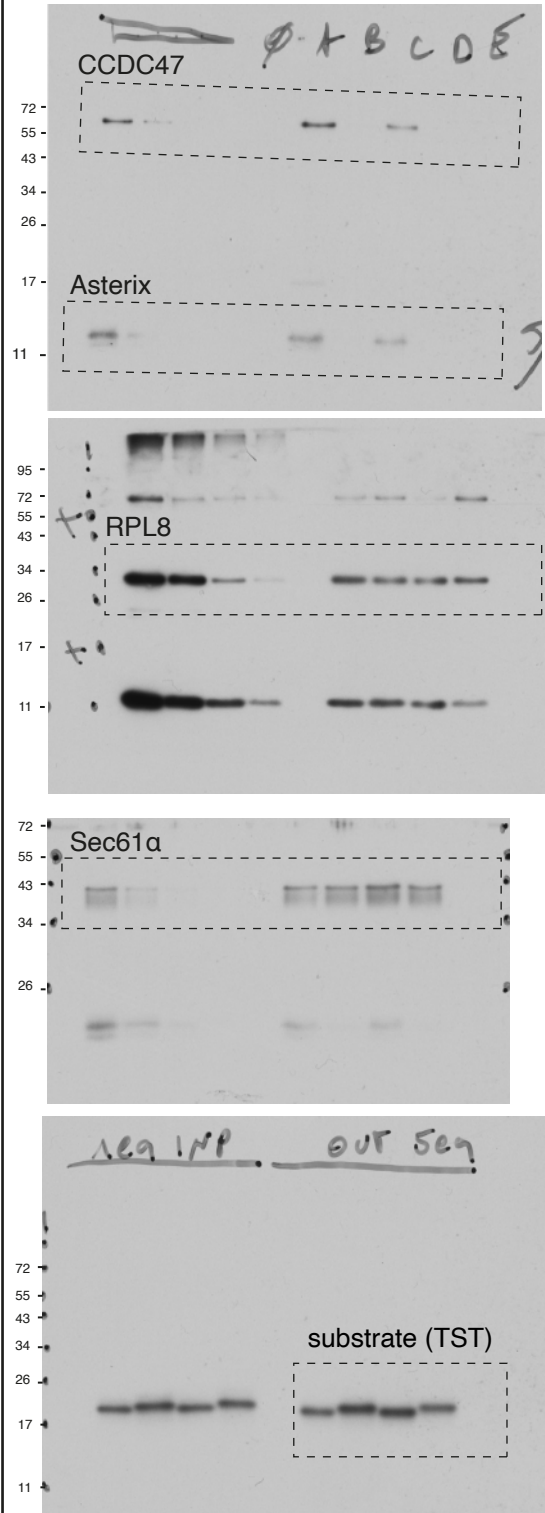

**Fig. 2c**

Autoradiographs on a Phosphor screen

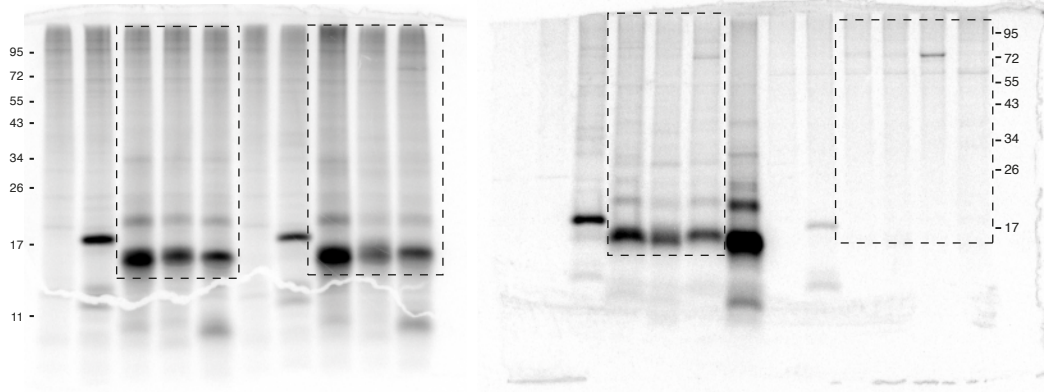

**Fig. 2d** Totals, autoradiograph

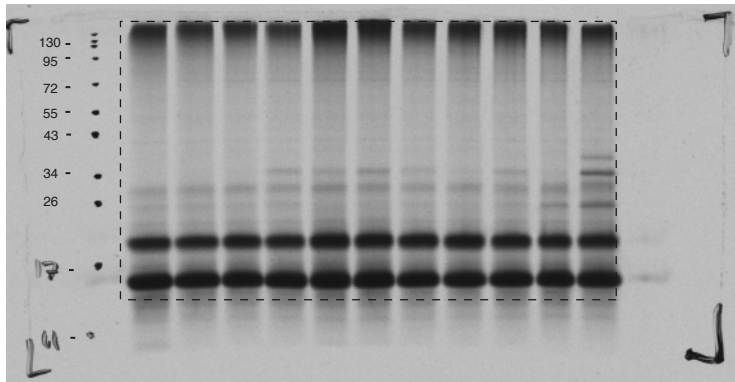

FLAG IP, autoradiograph

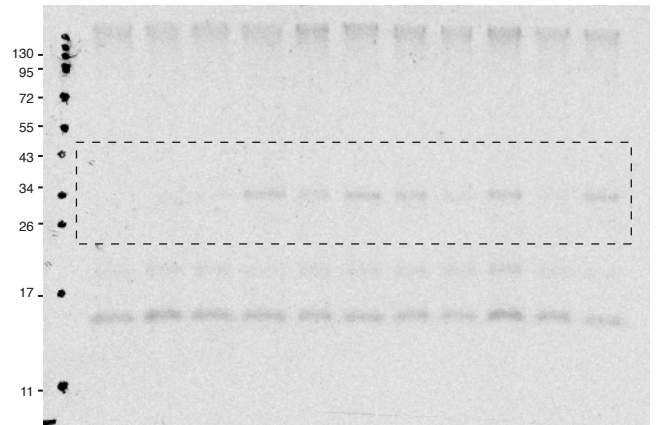

**Fig. 3b**

Totals, autoradiograph

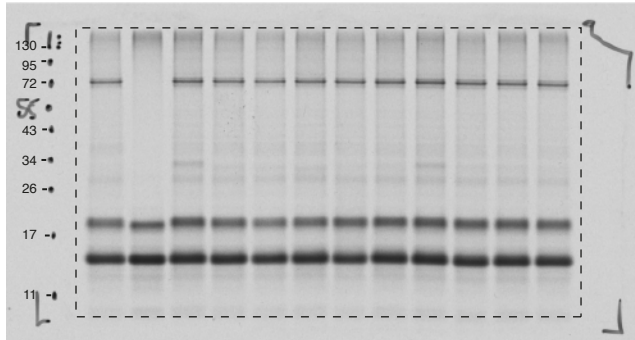

FLAG IP, autoradiograph

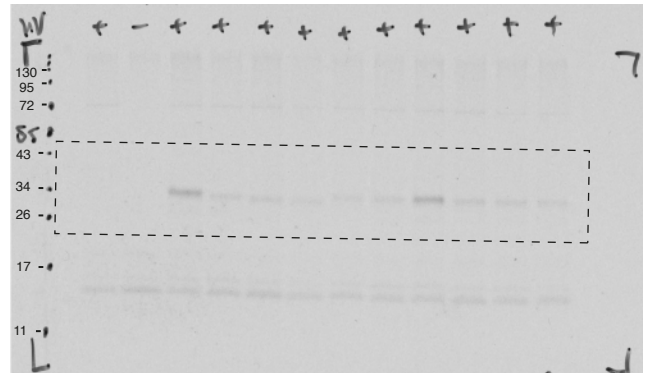

Asterix blot

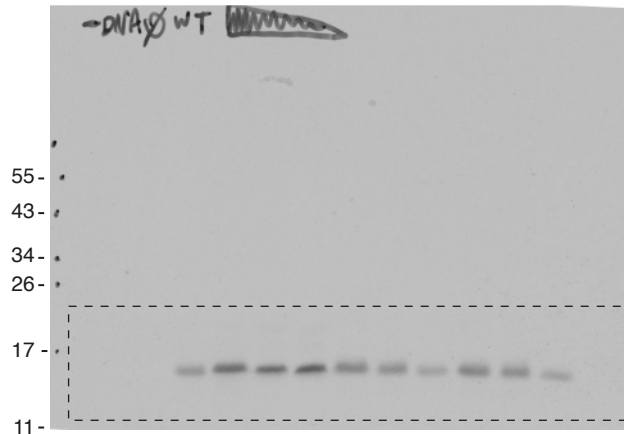

**Fig. 3d** Totals, autoradiograph

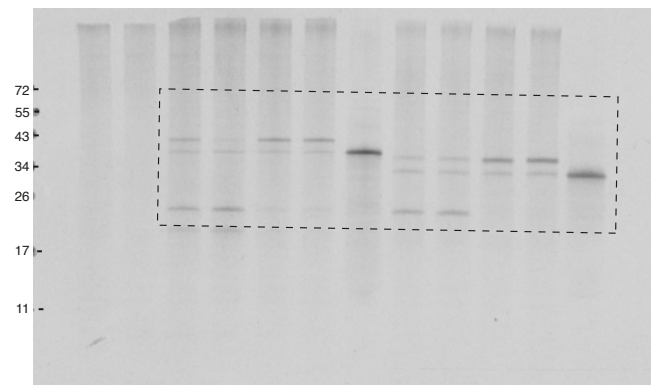

**Fig. 4b**

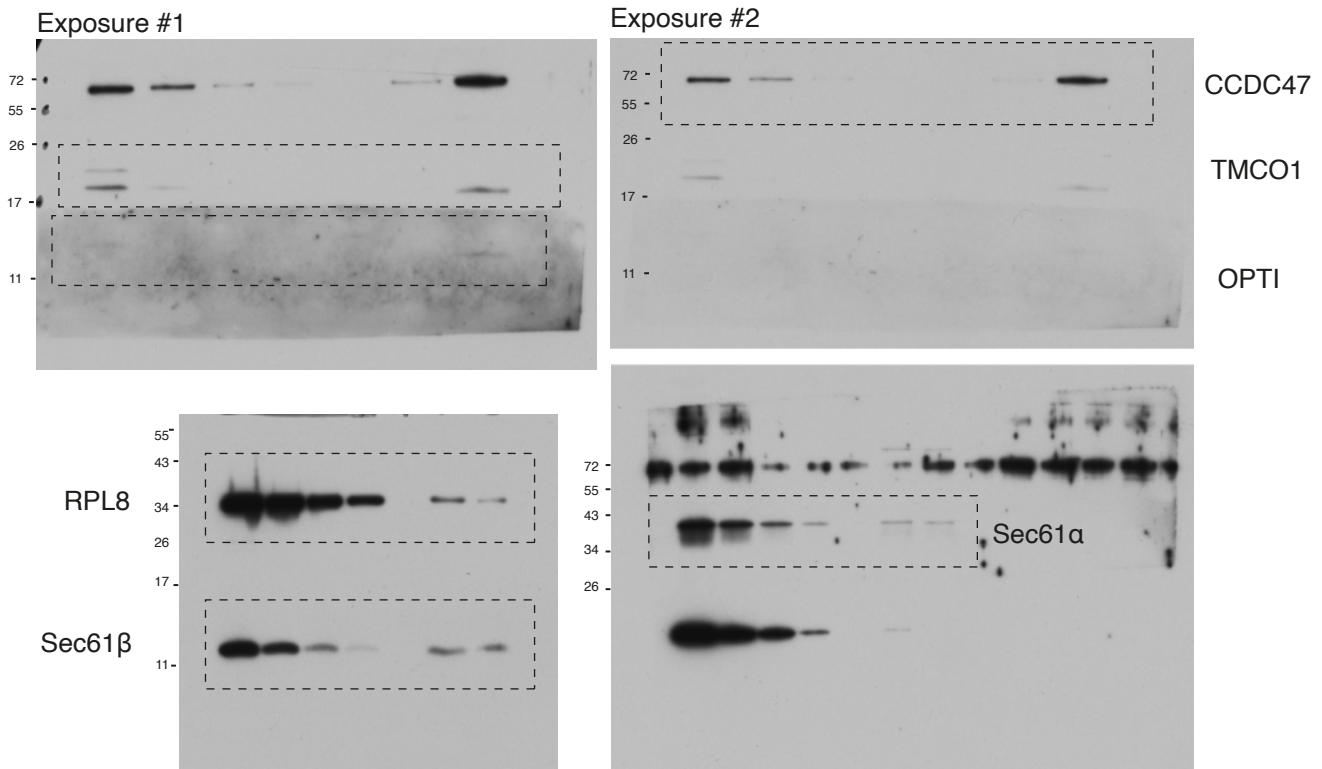

**Exposure #1**

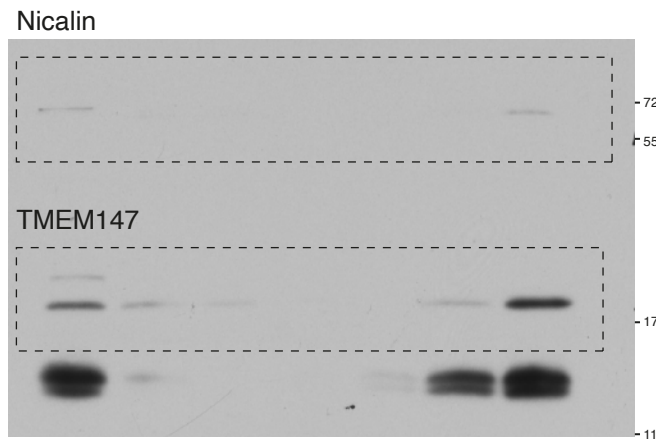

**Exposure #2**

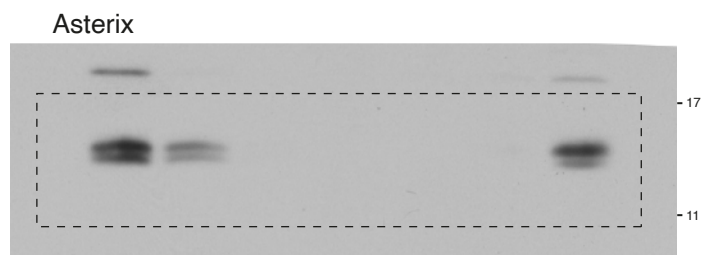

**NOMO**

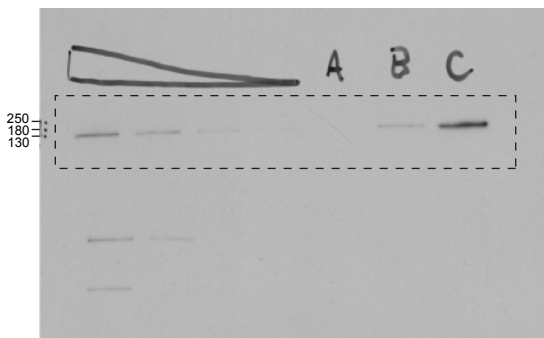

**Fig. 4d** Totals, autoradiograph

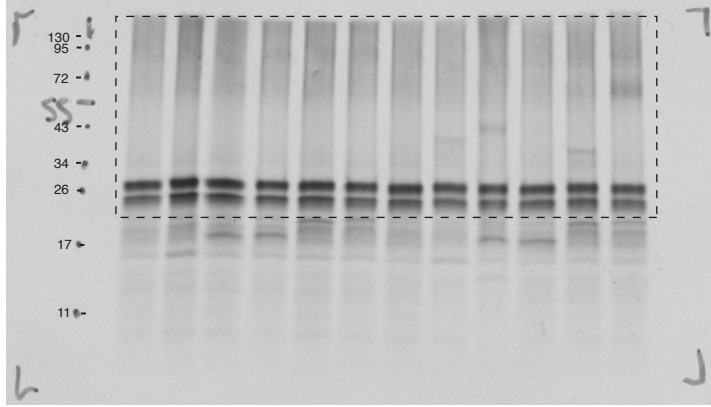

**Fig. 4e**

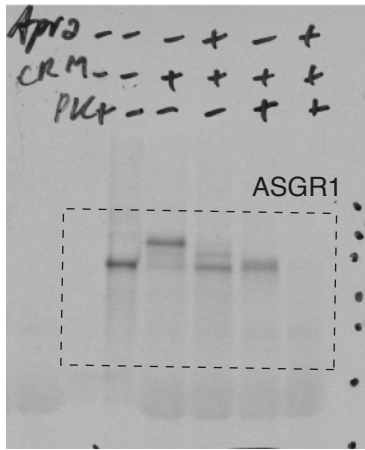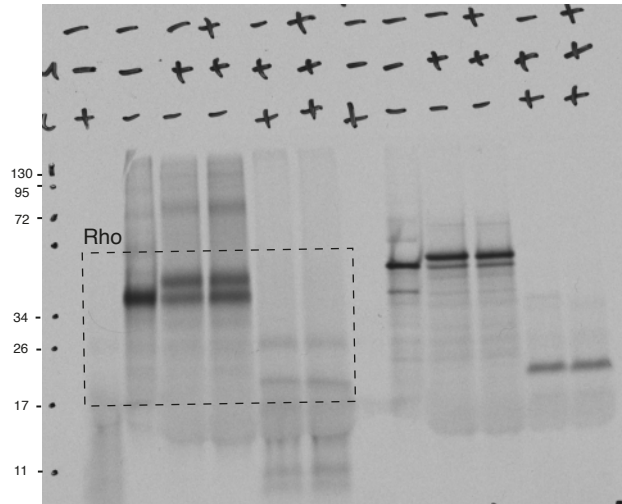

**ED 1a** Totals, autoradiograph

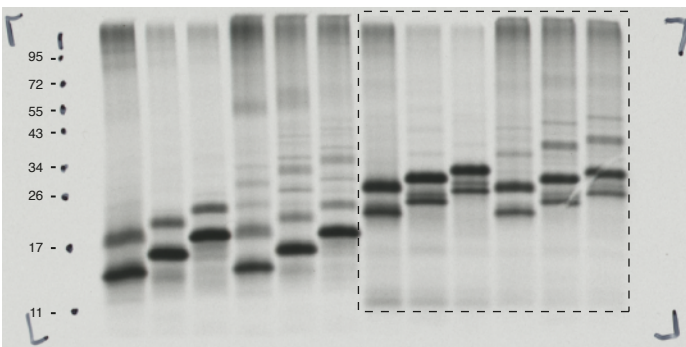

IP, autoradiograph

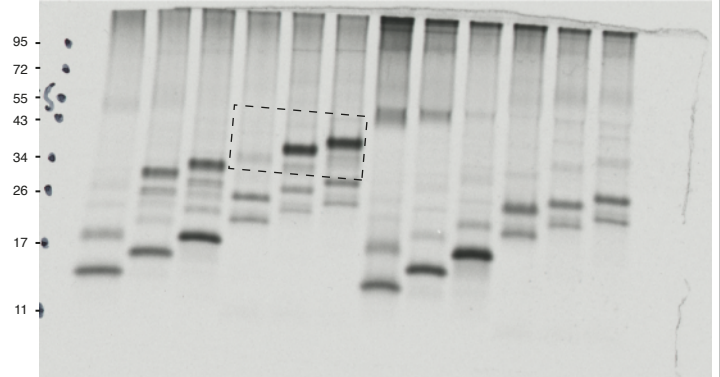

**ED 1b** Totals, autoradiograph on a Phosphor screen

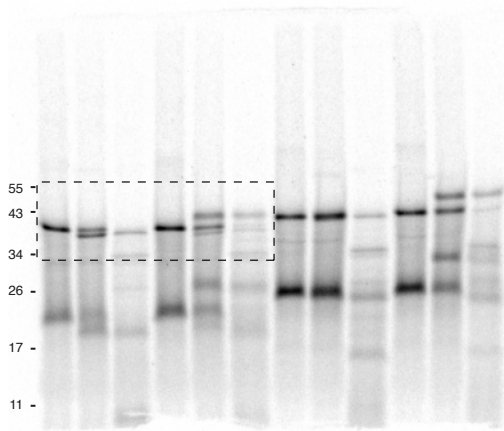

**ED 1c** Totals, autoradiograph on a Phosphor screen

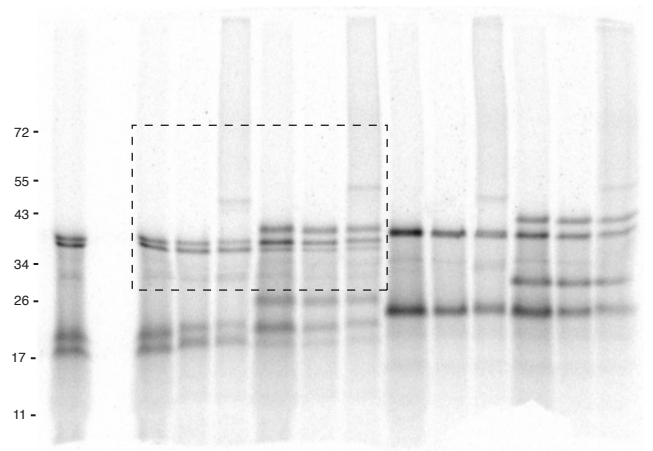

**ED 1d**

Exposure #1

Exposure #2

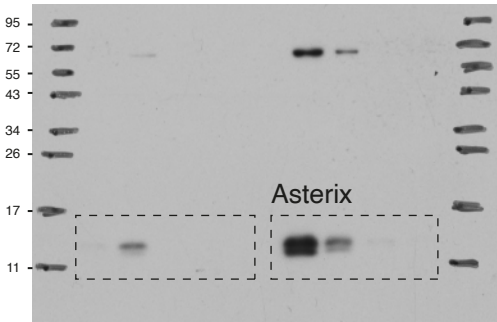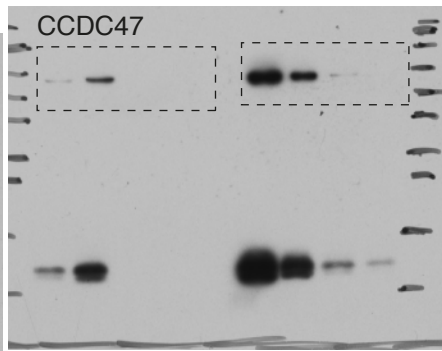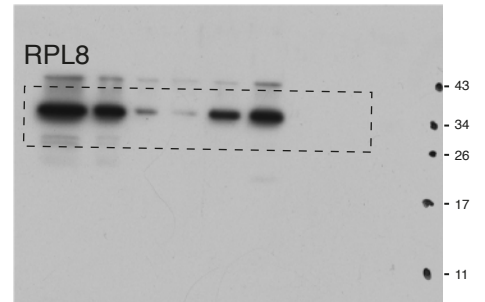

Exposure #1

Exposure #2

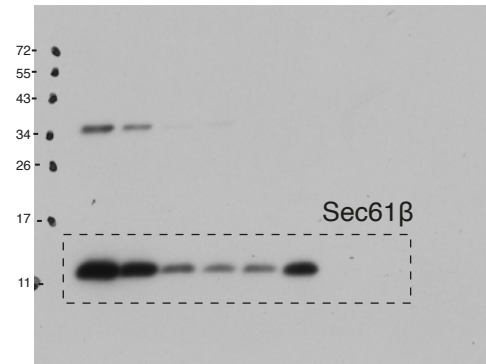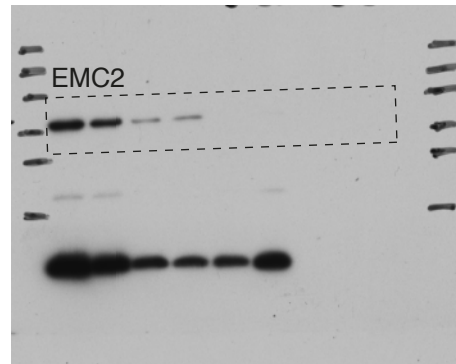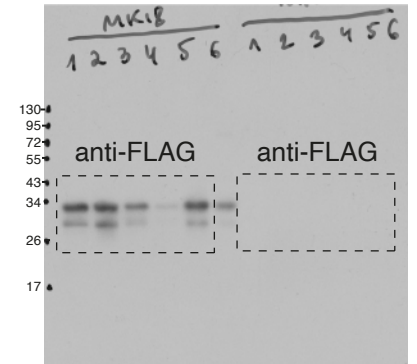

**ED 1e**

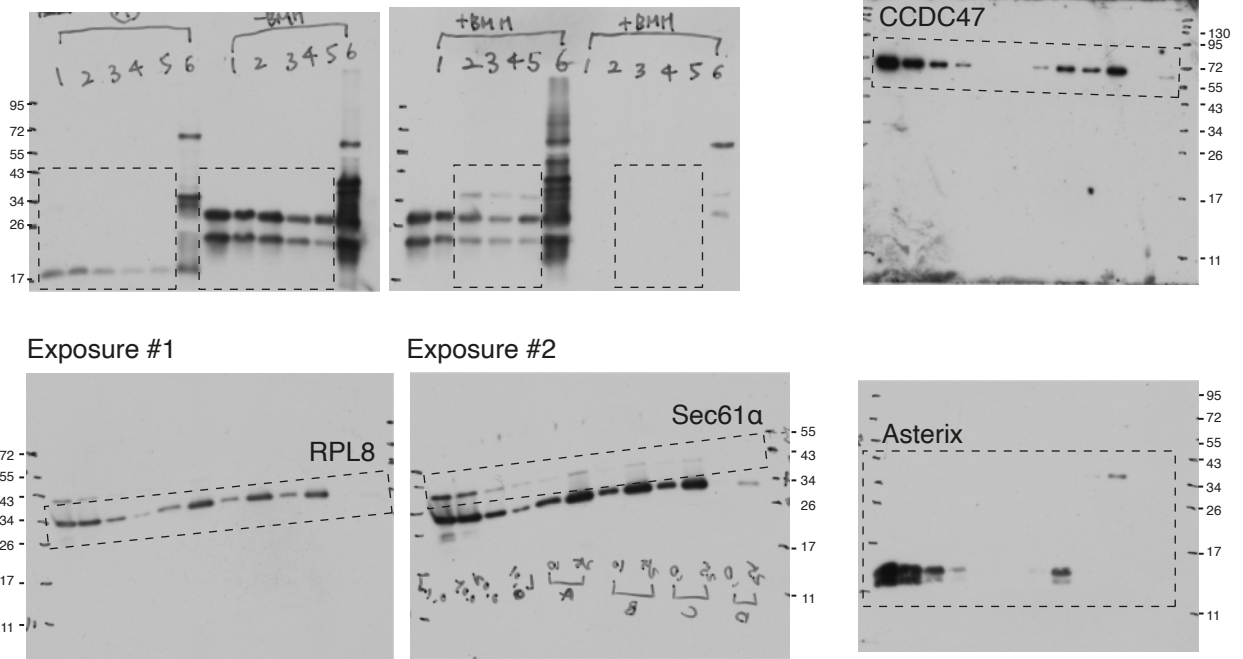

**ED 1f**

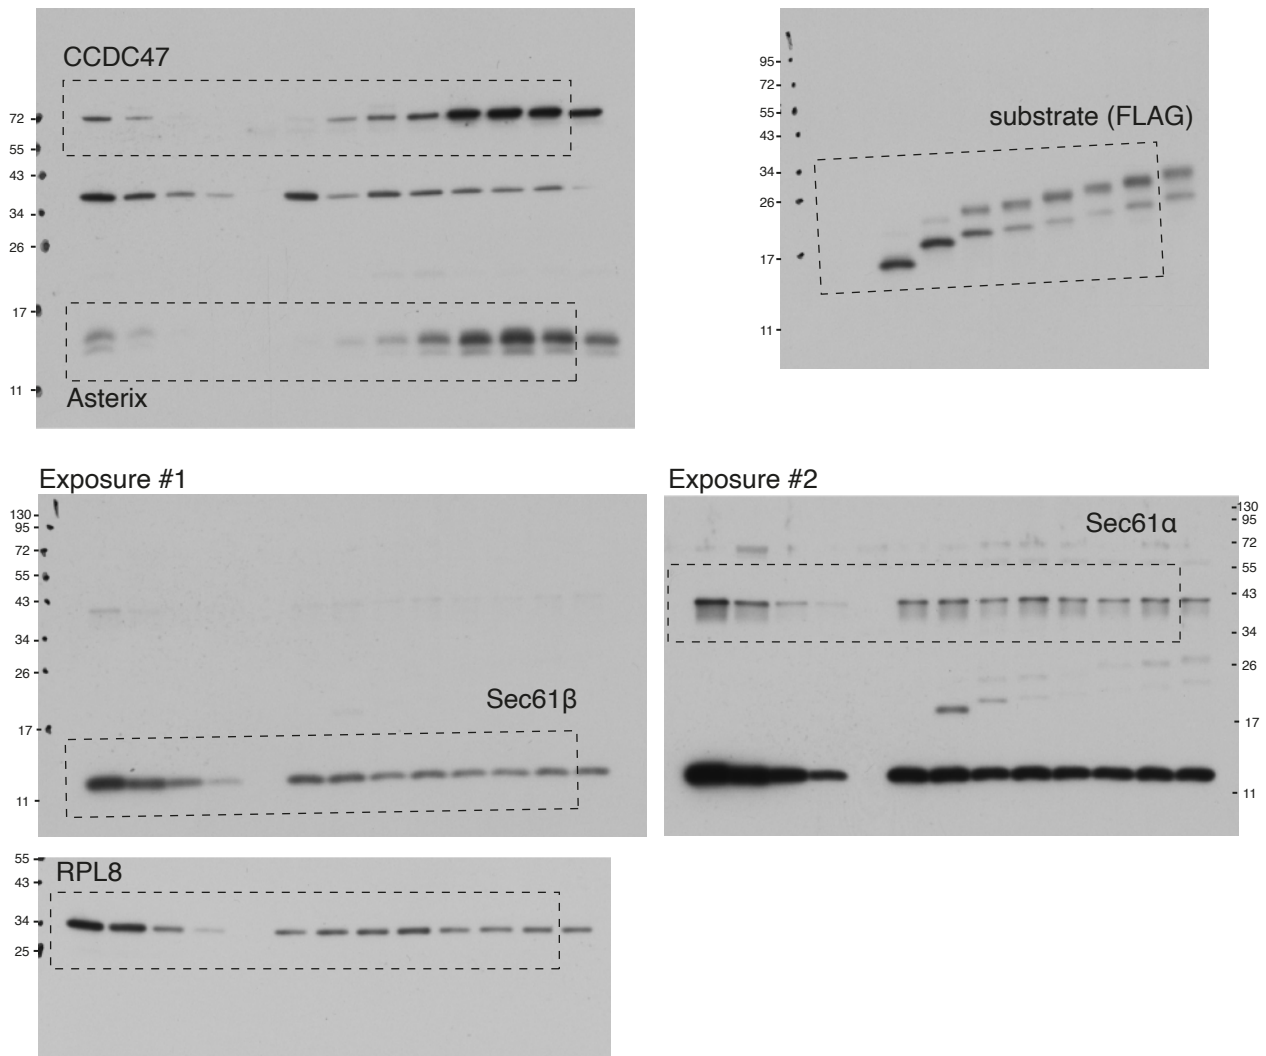

ED 5b and 5c - the images displayed in the figure are the full gels, so they are not shown again here.

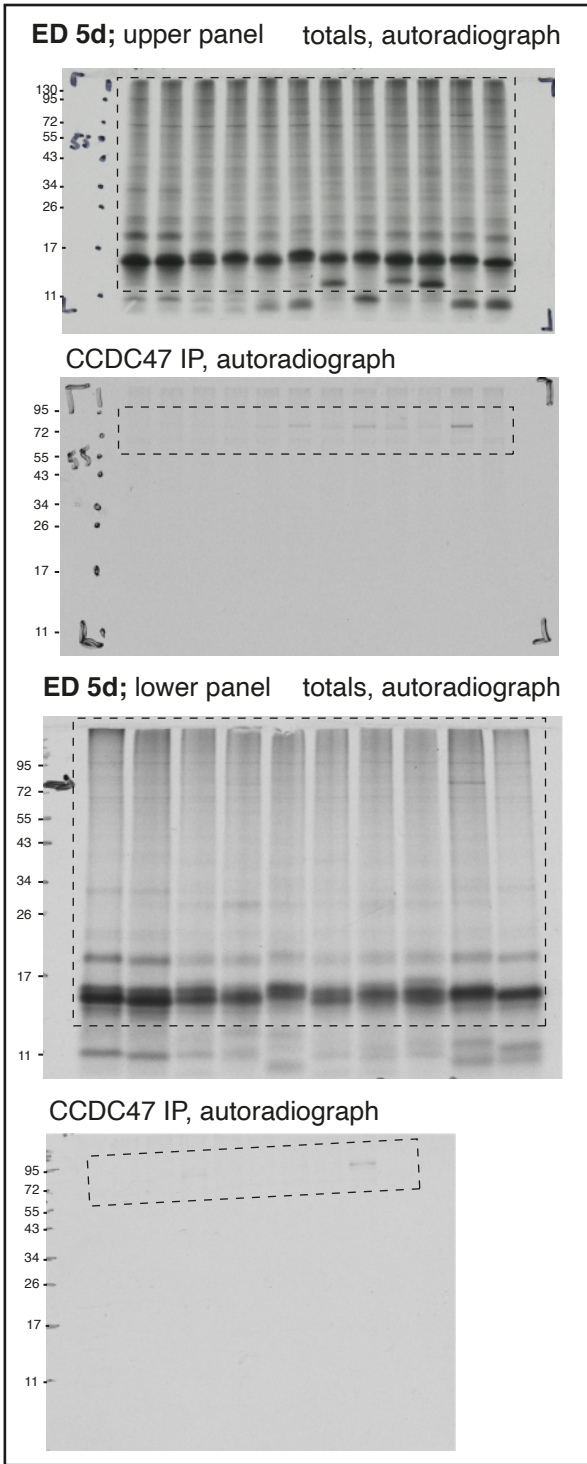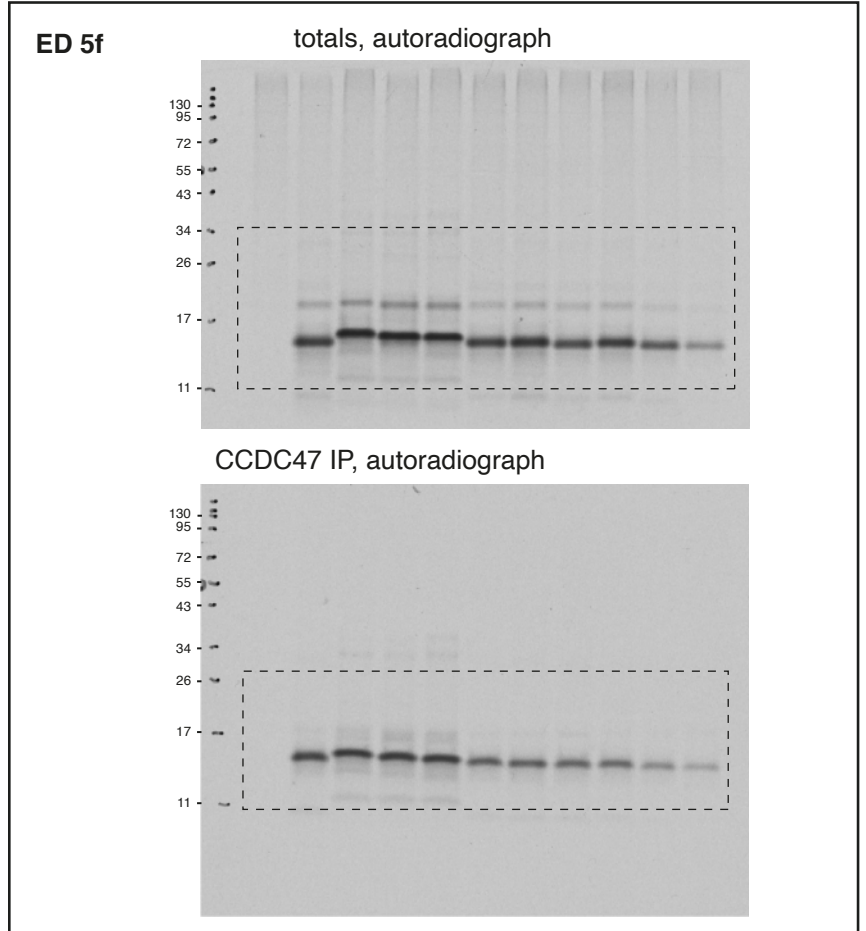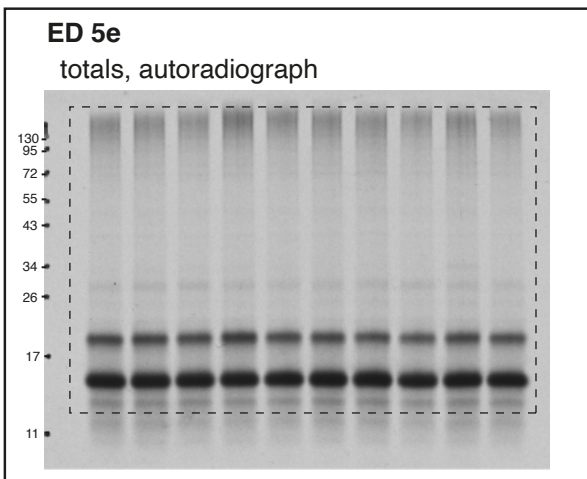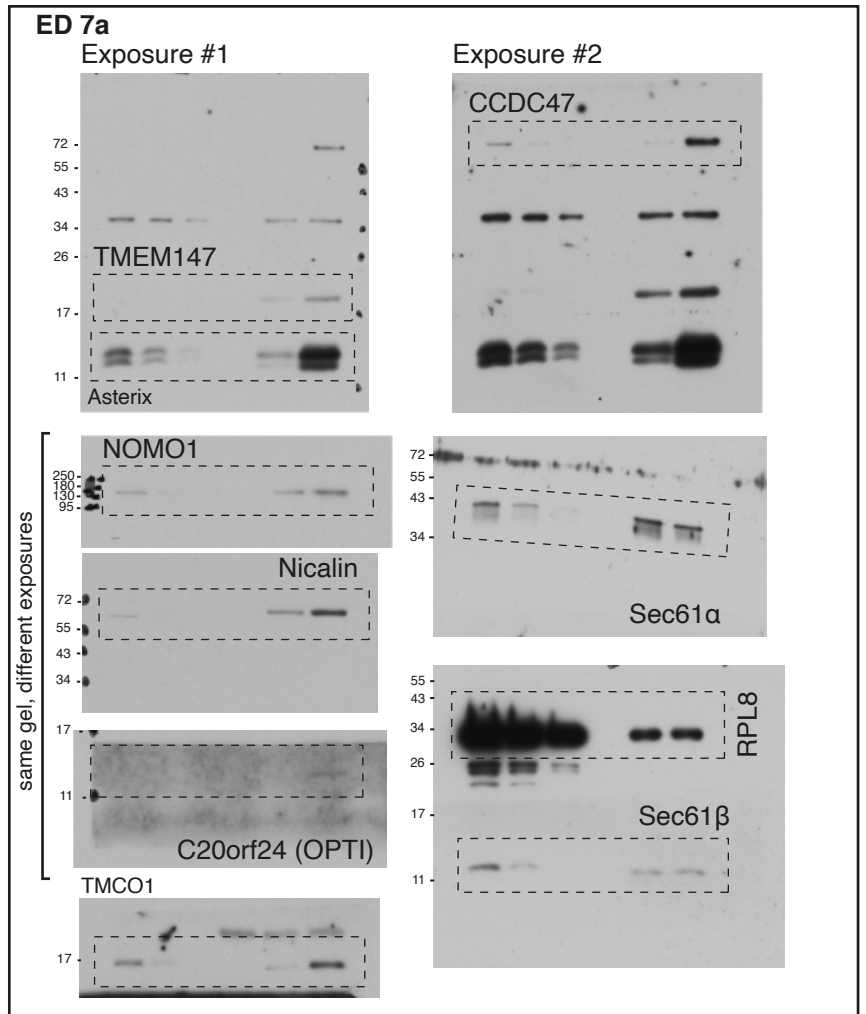

**ED 7b**

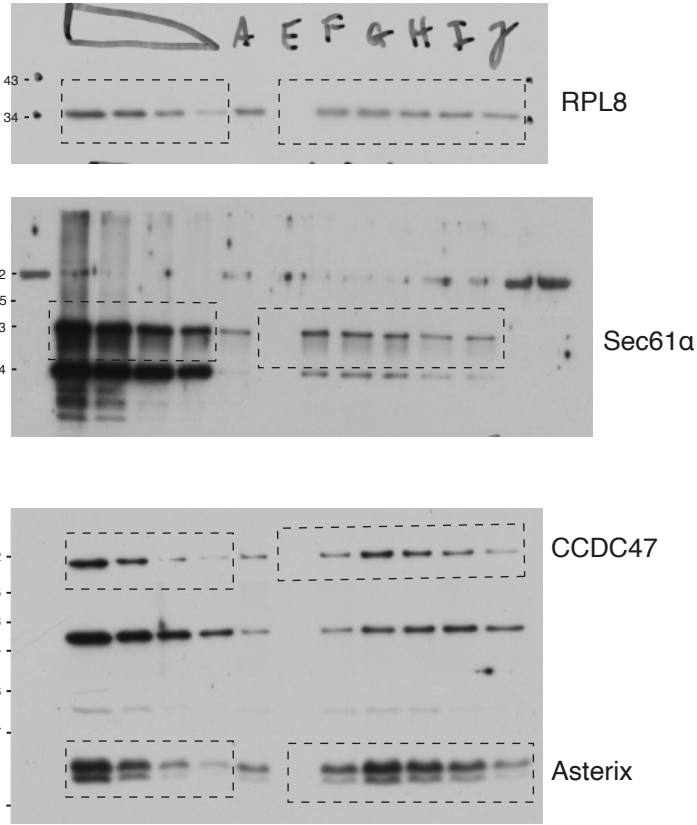

**ED 7c**

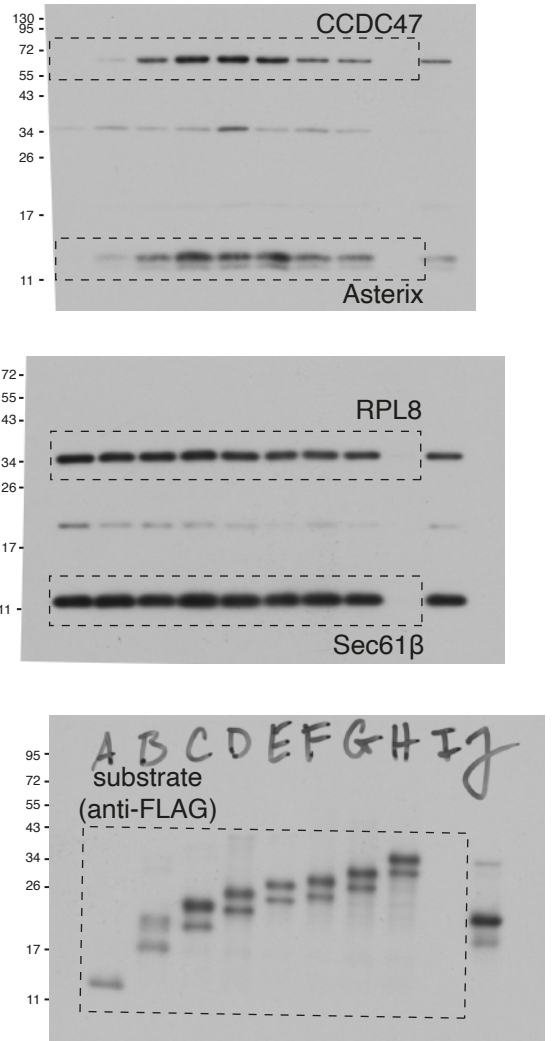

**ED 7d**

totals, autoradiograph

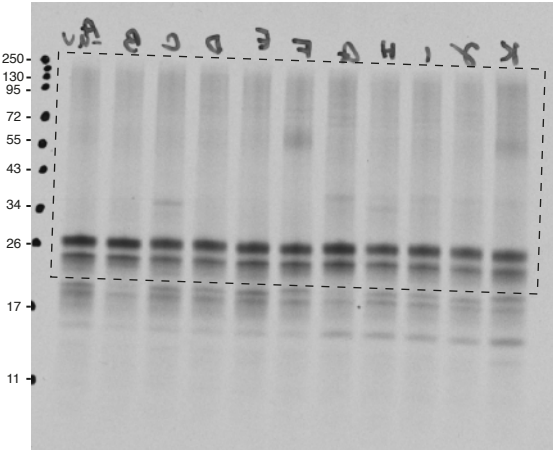

IPs, autoradiograph

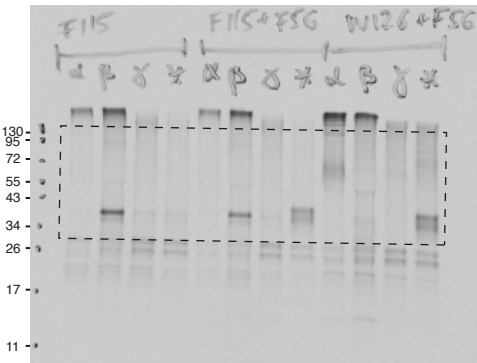

**ED 7e**

totals, autoradiograph

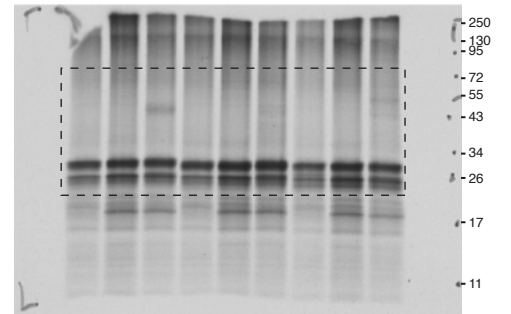

**ED 7f**

TST-IP, autoradiograph

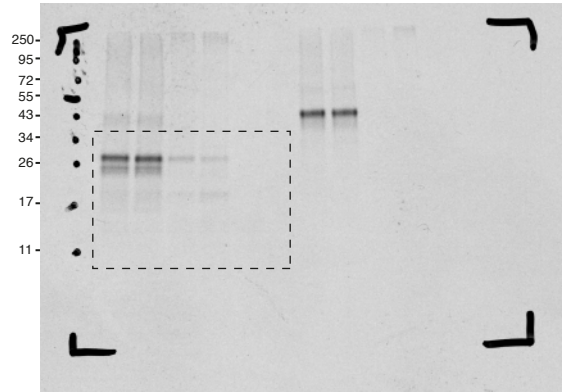



ED 7g

Exposure #1

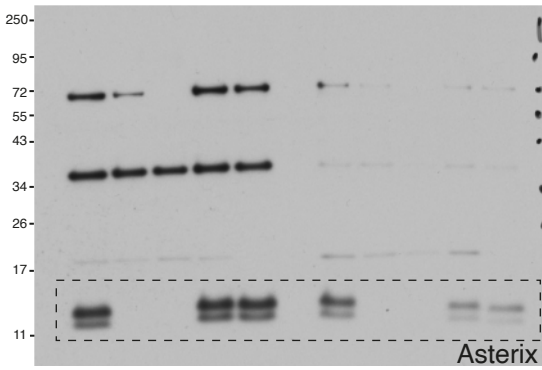

Exposure #2

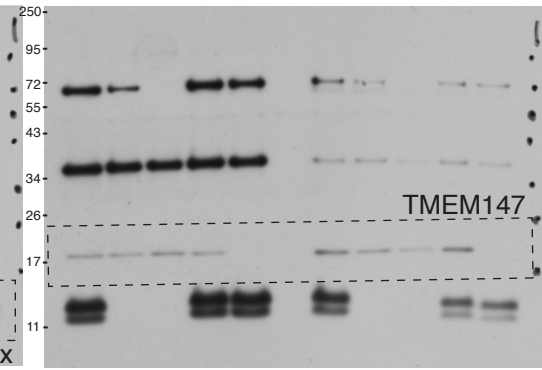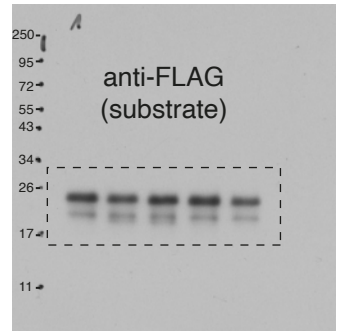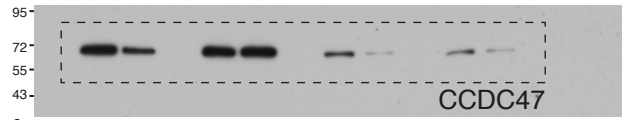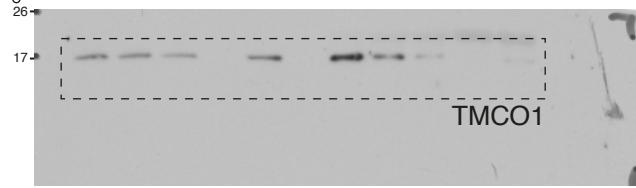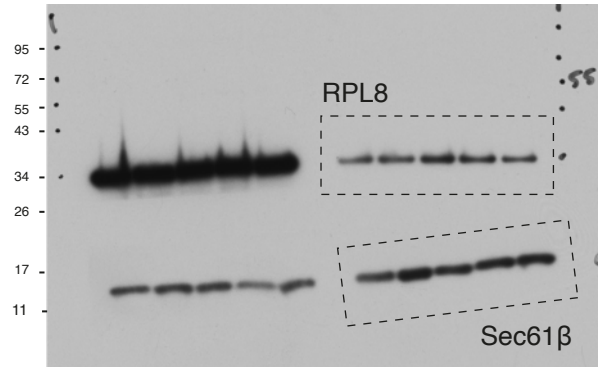

ED 7h

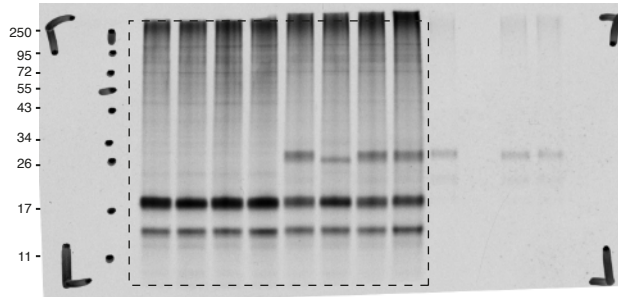

Asterix IP

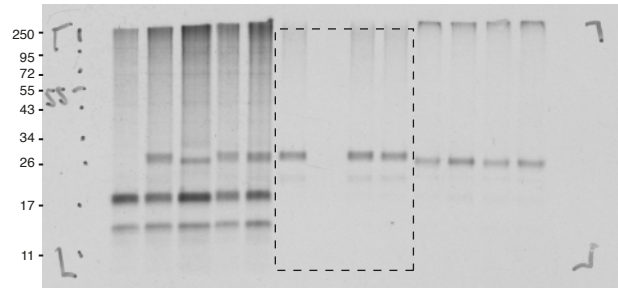

ED 9b

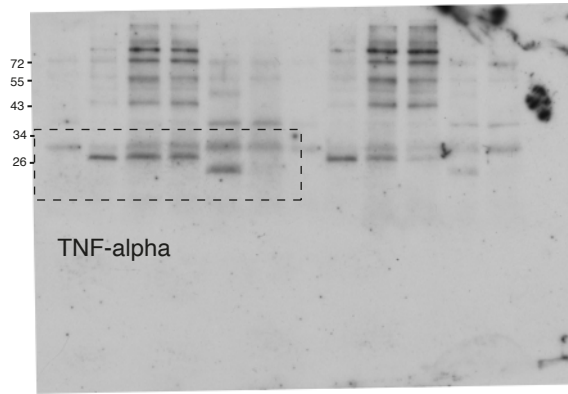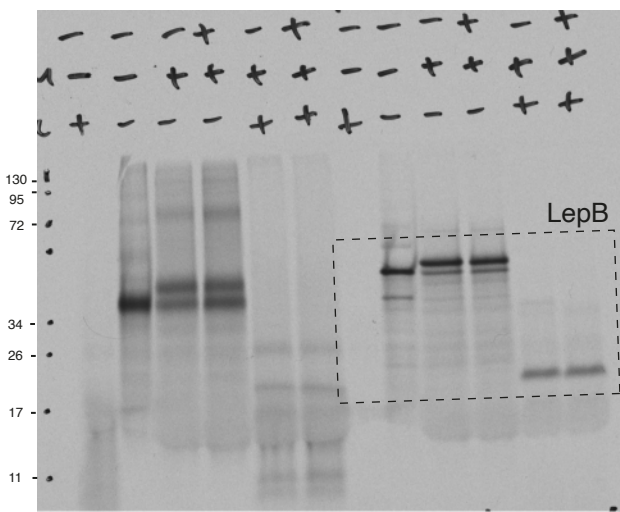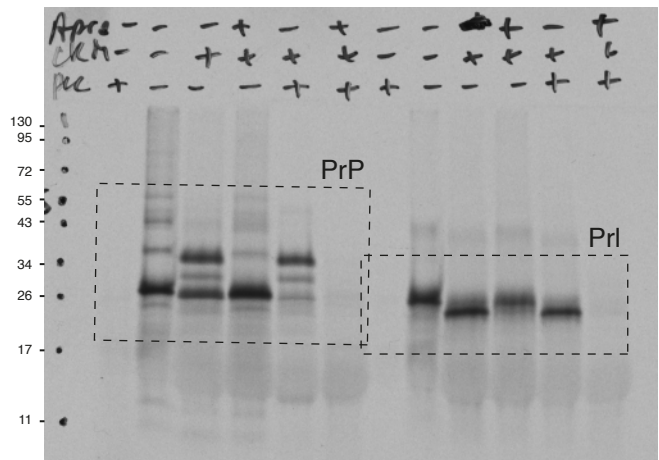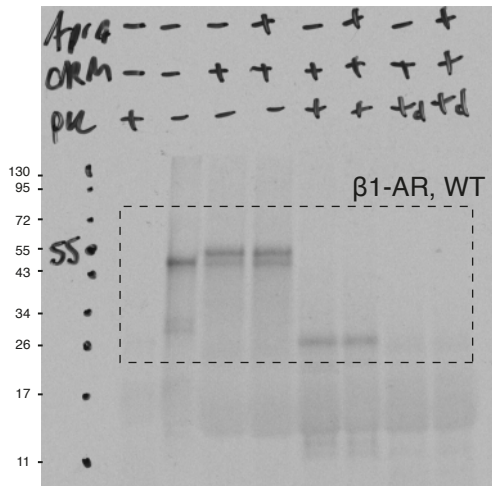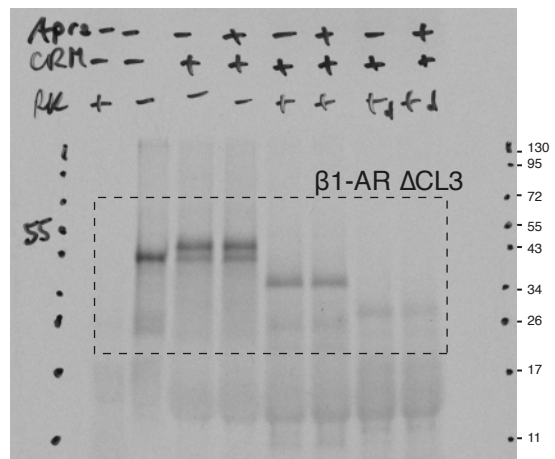

ED 9c

Exposure #1

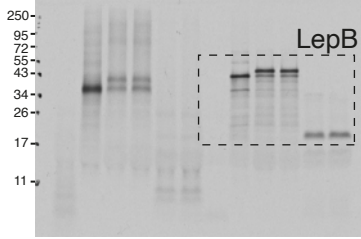

Exposure #2

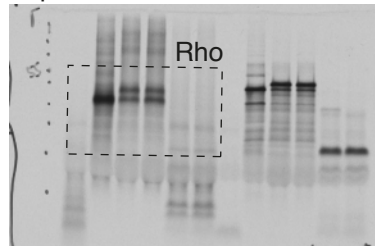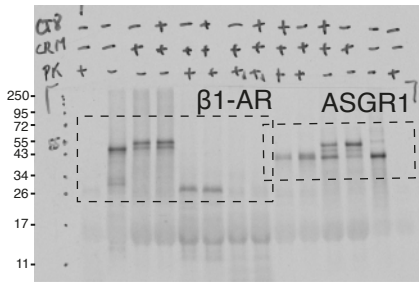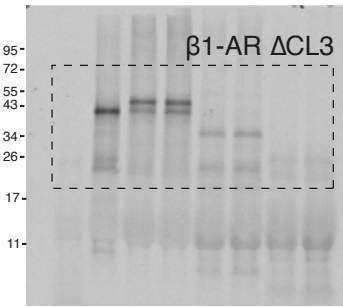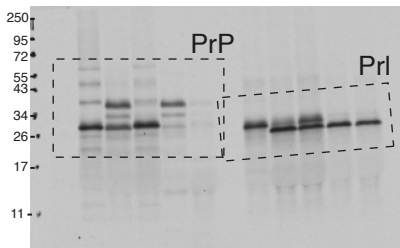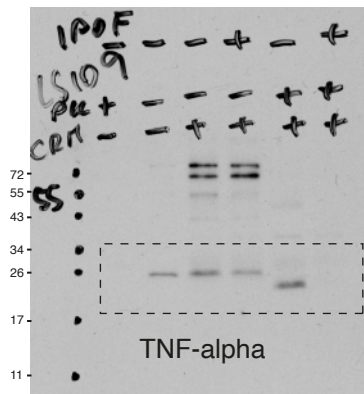

**ED 9d**

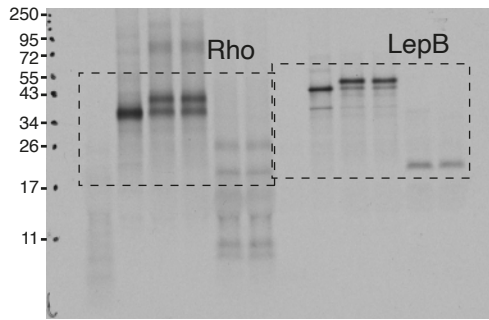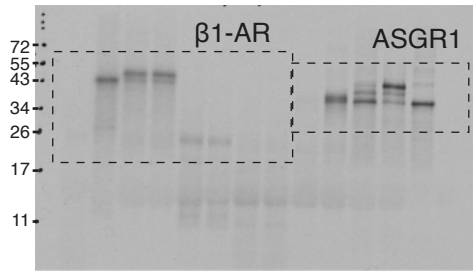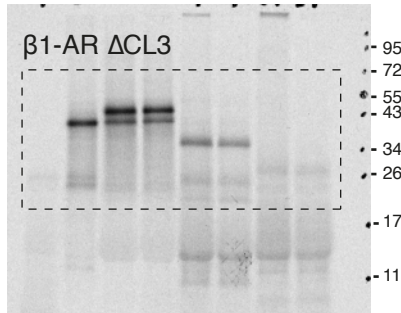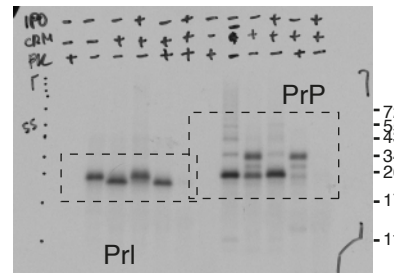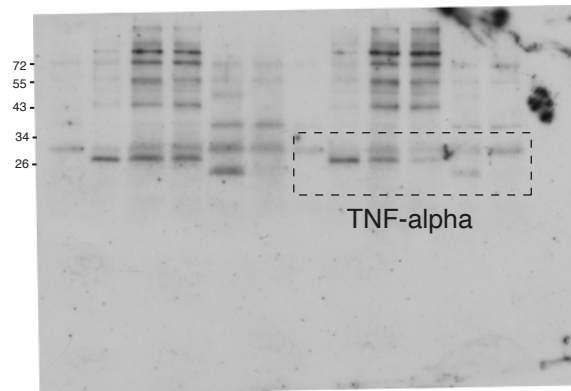

**ED 9e**

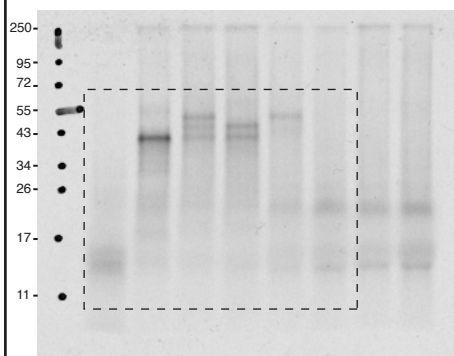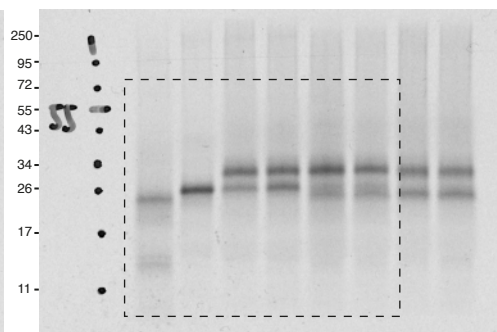

Supplement: EMS160227-supplement-Supplementary_Fig_1.pdf [file EMS160227-supplement-Supplementary_Fig_1.pdf]
