# Supplementary material
Source: PubMed Central journal article supplement (PMC7614104)

## Supplementary Figure 2. Representative gating strategy for flow cytometry analysis of reporters

Shown are the cells from each step of the gating procedure used to analyse the dual colour reporters in this study. This example is from the untreated sample for the Rho reporter shown in Fig. 4f. The four steps are: (i) forward and side scatter to select all cells; (ii) height versus area forward scatter to select single cells; (iii) absence of DAPI staining to select living cells; (iv) presence of reporter expression using fluorescence of the translation reporter (either GFP or RFP, depending on the construct). The cells meeting all these criteria are plotted in the figures as either histograms or dot plots.

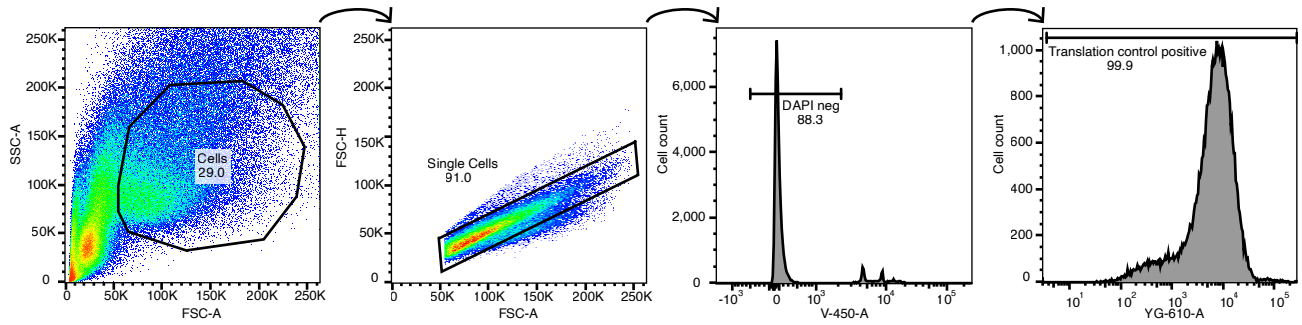

Supplement: EMS160227-supplement-Supplementary_Fig_2.pdf [file EMS160227-supplement-Supplementary_Fig_2.pdf]
